# Supplementary material
Source: publisher site journal article supplement (https://www.dovepress.com/article/437936)
Supplement: Supplementary file 1 [file get_supplementary_file.php]

**Online Supplementary Material**

**
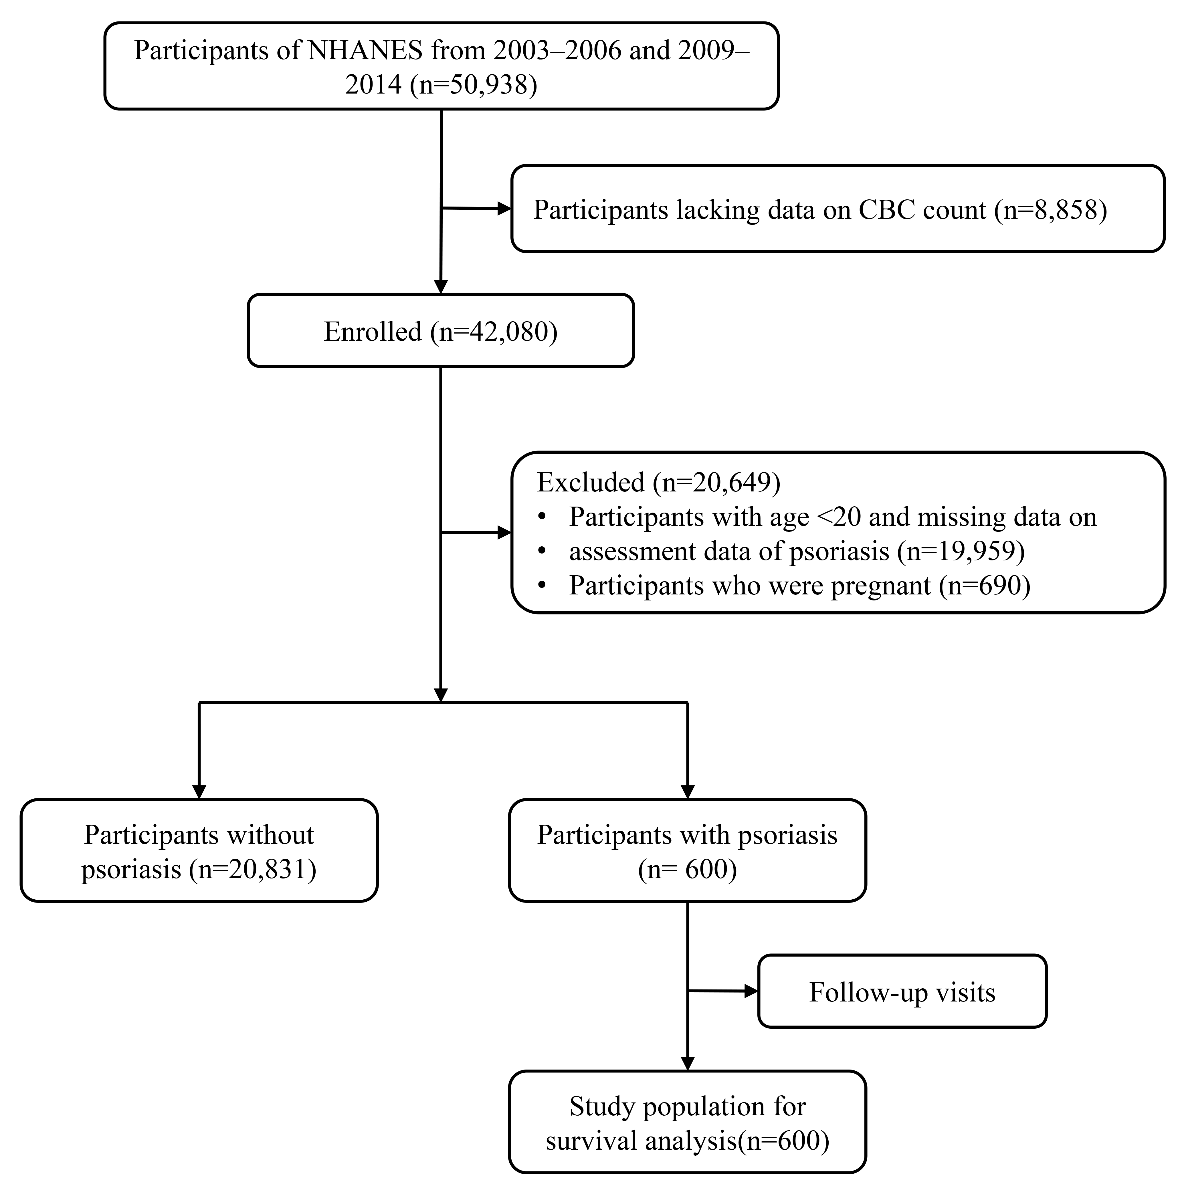
**

**Figure S1.** Flowchart of the study participants


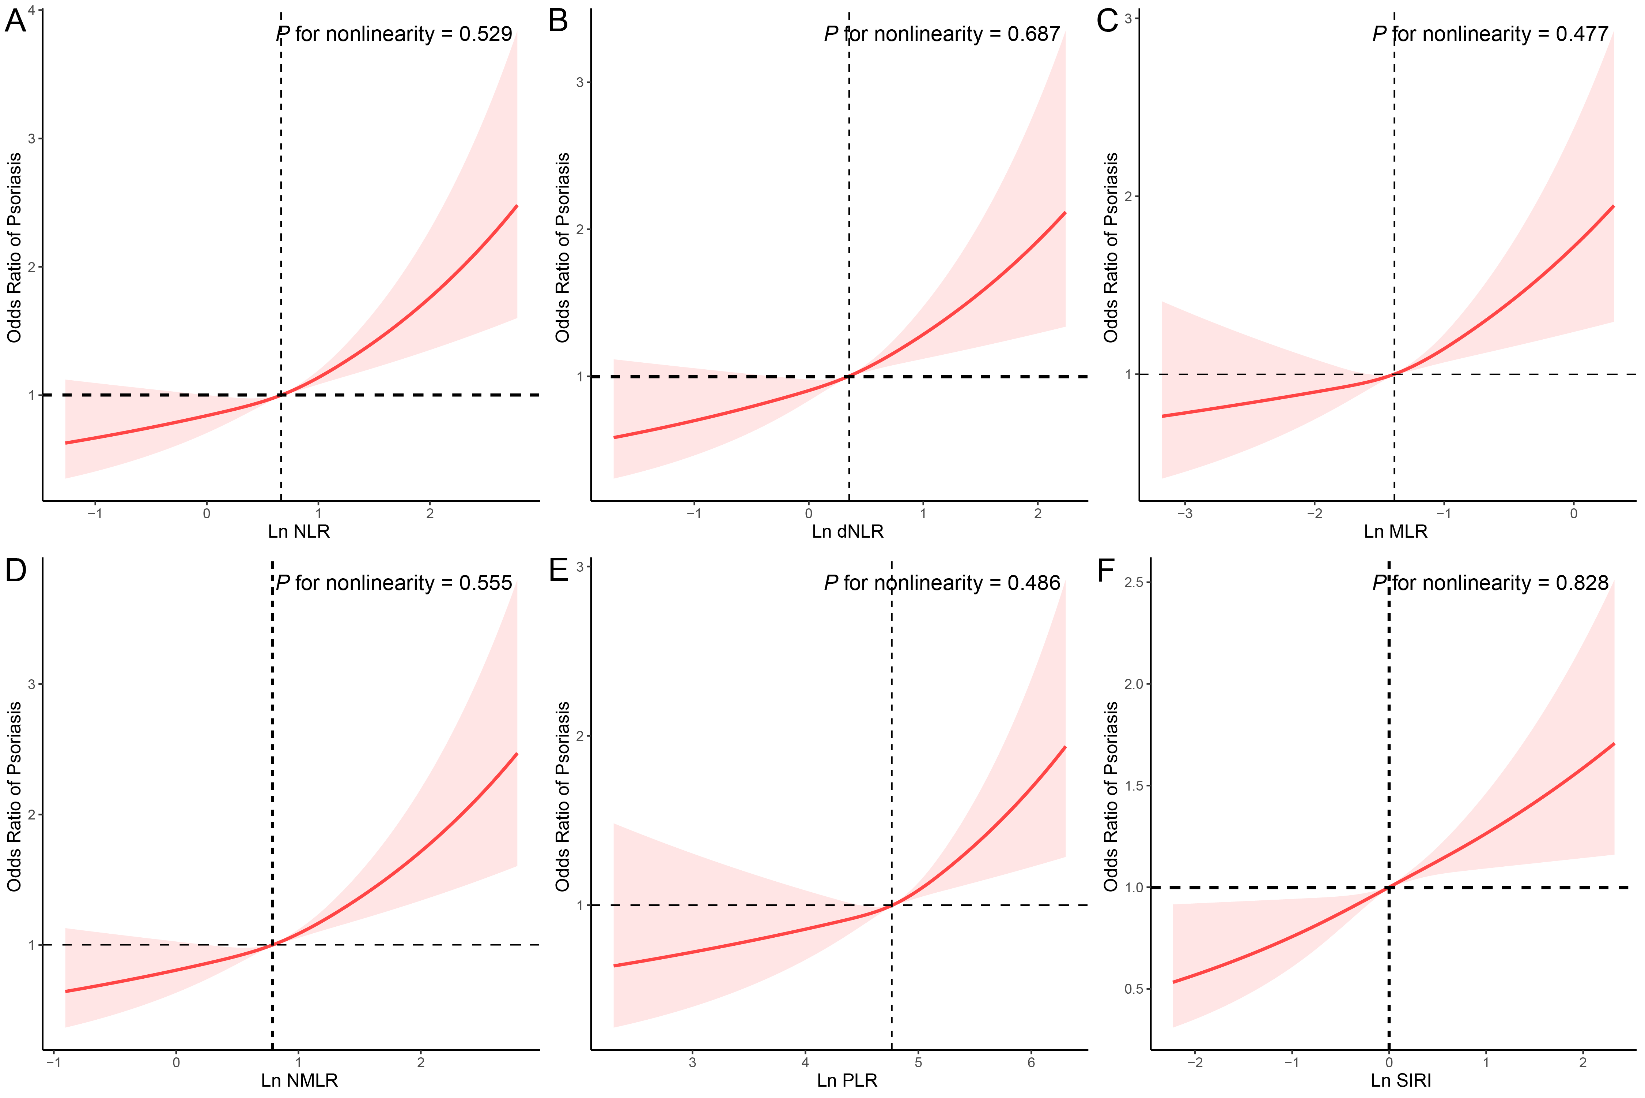


**Figure S2:** Restricted cubic spline analyses were conducted to investigate the association between complete blood cell count (CBC)-derived indicators (A: NLR; B: dNLR; C: MLR; D: NMLR; E: PLR; F: SIRI) and the prevalence of psoriasis in adults. The analyses were adjusted for age (continuous), sex (male or female), race/ethnicity (Mexican American, Other Hispanic, Non-Hispanic White, Non-Hispanic Black, or Other), education level (below high school, high school, or above high school), family poverty income ratio (continuous), drinking status (nondrinker, low-to-moderate drinker, or heavy drinker), smoking status (never smoker, former smoker, or current smoker), physical activity (inactive, insufficiently active, or active), and metabolic syndrome (yes or no).


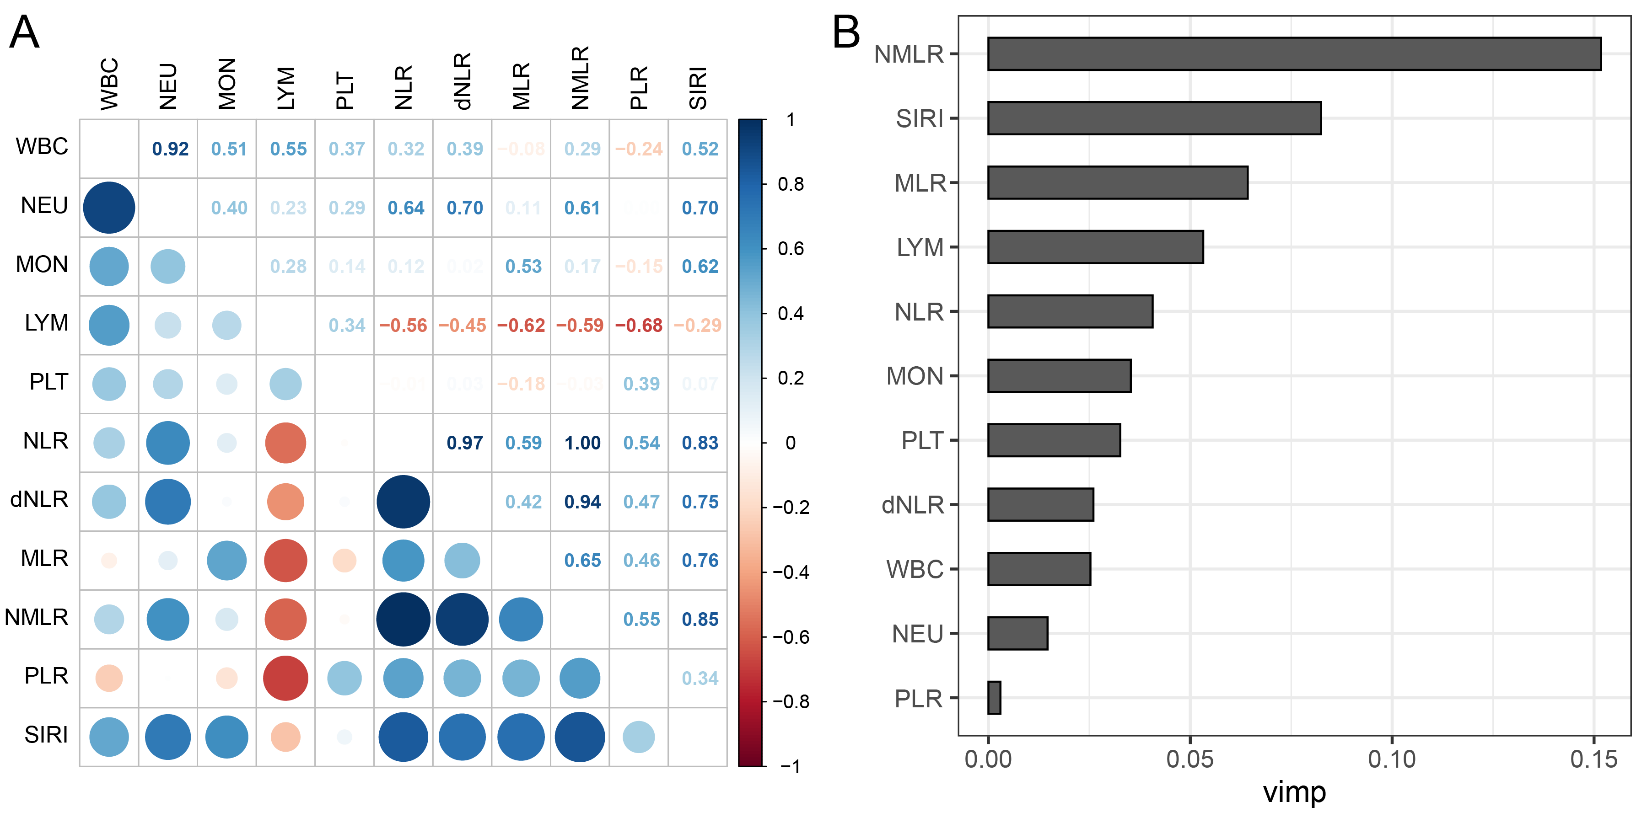


**Figure S3:** Prognostic importance of complete blood cell count (CBC)-derived indicators. Spearman correlation analysis was used to calculate the correlation coefficients among CBC parameters and CBC-derived inflammatory biomarkers (A); The random subsistence forest (RSF) was used to assess the prognostic importance of CBC parameters and CBC-derived inflammatory biomarkers in predicting all-cause mortality in psoriasis patients (B). Abbreviations:vimp, variable importance

**Table S1.** OR (95% CIs) of the prevalence of psoriasis according to quartiles of complete blood cell (CBC) counts among adults in NHANES 2003–2006 and 2009–2014.

|  | Quartiles of CBC counts | | | | *P*trend |
| --- | --- | --- | --- | --- | --- |
|  | Quartile 1 | Quartile 2 | Quartile 3 | Quartile 4 |
| **WBC** | |  |  |  |  |
| Range | <5.7 | 5.7-6.9 | 7.0-8.4 | >8.4 |  |
| Crude | 1 [Reference] | 0.857(0.664,1.105) | 1.048(0.793,1.386) | 1.142(0.843,1.547) | 0.229 |
| Model 1 | 1 [Reference] | 0.848(0.659,1.091) | 1.042(0.783,1.386) | 1.149(0.847,1.559) | 0.215 |
| Model 2 | 1 [Reference] | 0.833(0.647,1.071) | 1.000(0.749,1.335) | 1.095(0.801,1.496) | 0.367 |
| **NEU** | |  |  |  |  |
| Range | <3.1 | 3.1-4.0 | 4.1-5.1 | >5.1 |  |
| Crude | 1 [Reference] | 1.072(0.802,1.432) | 1.046(0.780,1.402) | 1.459(1.087,1.959) | 0.012 |
| Model 1 | 1 [Reference] | 1.023(0.762,1.373) | 0.994(0.736,1.341) | 1.388(1.029,1.873) | 0.027 |
| Model 2 | 1 [Reference] | 1.008(0.750,1.356) | 0.970(0.721,1.306) | 1.346(1.001,1.810) | 0.039 |
| **LYM** |  |  |  |  |  |
| Range | <1.6 | 1.6-2.0 | 2.1-2.5 | >2.5 |  |
| Crude | 1 [Reference] | 0.796(0.620,1.022) | 0.711(0.542,0.932) | 0.790(0.591,1.056) | 0.074 |
| Model 1 | 1 [Reference] | 0.846(0.655,1.092) | 0.787(0.600,1.032) | 0.904(0.675,1.210) | 0.394 |
| Model 2 | 1 [Reference] | 0.832(0.642,1.077) | 0.758(0.572,1.005) | 0.853(0.625,1.165) | 0.235 |
| **MON** |  |  |  |  |  |
| Range | <0.4 | 0.4-0.5 | 0.6-0.7 | >0.7 |  |
| Crude | 1 [Reference] | 1.269(0.980,1.642) | 1.085(0.736,1.600) | 1.291(0.983,1.694) | 0.169 |
| Model 1 | 1 [Reference] | 1.226(0.947,1.586) | 1.029(0.696,1.522) | 1.205(0.907,1.601) | 0.379 |
| Model 2 | 1 [Reference] | 1.200(0.933,1.545) | 1.022(0.695,1.504) | 1.164(0.876,1.548) | 0.500 |
| **PLT** |  |  |  |  |  |
| Range | <203.0 | 203.0-240.0 | 241.0-285.0 | >285.0 |  |
| Crude | 1 [Reference] | 1.179(0.899,1.546) | 0.917(0.650,1.293) | 1.134(0.856,1.503) | 0.694 |
| Model 1 | 1 [Reference] | 1.232(0.941,1.612) | 0.983(0.701,1.379) | 1.253(0.938,1.674) | 0.299 |
| Model 2 | 1 [Reference] | 1.230(0.934,1.621) | 0.979(0.697,1.374) | 1.206(0.903,1.612) | 0.437 |

Data are presented as OR (95% CI) unless indicated otherwise; Model 1 was adjusted as age (continuous), sex (male or female), and race/ethnicity (Mexican American, Other Hispanic, Non-Hispanic White, Non-Hispanic Black or Other); Model 2 was adjusted as model 1 plus education level (below high school, high school, or above high school), family poverty income ratio (continuous), drinking status (nondrinker, low-to-moderate drinker, or heavy drinker), smoking status (never smoker, former smoker, or current smoker), physical activity (inactive, insufficiently active, or active), and metabolic syndrome (yes or no).

**Table S2.** OR (95% CIs) of degree of psoriasis (mild vs moderate to severe) according to quartiles of CBC-derived inflammatory biomarkers among adults in NHANES 2003–2006 and 2009–2014.

|  | Quartiles of CBC-derived inflammatory biomarkers levels | | | | *P*trend |
| --- | --- | --- | --- | --- | --- |
|  | Quartile 1 | Quartile 2 | Quartile 3 | Quartile 4 |
| **NLR** | |  |  |  |  |
| Range | <1.64 | 1.64-2.18 | 2.19-2.95 | >2.95 |  |
| Crude | 1 [Reference] | 0.885(0.351,2.231) | 1.258(0.517,3.060) | 1.614(0.714,3.652) | 0.118 |
| Model 1 | 1 [Reference] | 0.943(0.381,2.333) | 1.281(0.544,3.011) | 1.872(0.819,4.277) | 0.065 |
| Model 2 | 1 [Reference] | 1.140(0.460,2.826) | 1.272(0.578,2.801) | 1.678(0.722,3.902) | 0.198 |
| **dNLR** | |  |  |  |  |
| Range | <1.20 | 1.20-1.54 | 1.55-1.96 | >1.96 |  |
| Crude | 1 [Reference] | 0.962(0.366,2.531) | 0.992(0.409,2.409) | 1.723(0.750,3.956) | 0.111 |
| Model 1 | 1 [Reference] | 0.998(0.379,2.627) | 0.988(0.411,2.374) | 1.898(0.826,4.363) | 0.078 |
| Model 2 | 1 [Reference] | 1.170(0.424,3.226) | 0.929(0.412,2.092) | 1.624(0.705,3.744) | 0.245 |
| **MLR** |  |  |  |  |  |
| Range | <0.21 | 0.21-0.28 | 0.29-0.36 | >0.36 |  |
| Crude | 1 [Reference] | 2.117(0.971,4.616) | 1.479(0.673,3.254) | 2.074(0.858,5.011) | 0.241 |
| Model 1 | 1 [Reference] | 2.190(0.993,4.830) | 1.677(0.719,3.912) | 2.364(0.963,5.804) | 0.152 |
| Model 2 | 1 [Reference] | 2.688(1.040,6.945) | 1.833(0.803,4.186) | 2.326(0.997,5.428) | 0.184 |
| **NMLR** |  |  |  |  |  |
| Range | <1.89 | 1.89-2.43 | 2.44-3.23 | >3.23 |  |
| Crude | 1 [Reference] | 1.198(0.496,2.894) | 1.193(0.495,2.877) | 1.921(0.858,4.303) | 0.082 |
| Model 1 | 1 [Reference] | 1.278(0.536,3.046) | 1.215(0.518,2.850) | 2.281(1.008,5.162) | 0.040 |
| Model 2 | 1 [Reference] | 1.565(0.655,3.735) | 1.223(0.562,2.660) | 2.097(0.919,4.787) | 0.123 |
| **PLR** |  |  |  |  |  |
| Range | <97.24 | 97.24-123.43 | 123.44-154.68 | >154.68 |  |
| Crude | 1 [Reference] | 1.189(0.484,2.921) | 0.963(0.391,2.371) | 1.441(0.676,3.071) | 0.368 |
| Model 1 | 1 [Reference] | 1.235(0.485,3.146) | 0.991(0.383,2.563) | 1.506(0.694,3.272) | 0.311 |
| Model 2 | 1 [Reference] | 1.328(0.481,3.662) | 1.117(0.426,2.928) | 1.483(0.680,3.234) | 0.338 |
| **SIRI** |  |  |  |  |  |
| Range | <0.80 | 0.80-1.18 | 1.19-1.73 | >1.73 |  |
| Crude | 1 [Reference] | 0.782(0.335,1.827) | 1.438(0.652,3.172) | 1.642(0.805,3.348) | 0.072 |
| Model 1 | 1 [Reference] | 0.807(0.344,1.894) | 1.513(0.702,3.262) | 1.773(0.841,3.734) | 0.060 |
| Model 2 | 1 [Reference] | 0.810(0.320,2.051) | 1.394(0.643,3.025) | 1.364(0.648,2.872) | 0.241 |

Data are presented as OR (95% CI) unless indicated otherwise; Model 1 was adjusted as age (continuous), sex (male or female), and race/ethnicity (Mexican American, Other Hispanic, Non-Hispanic White, Non-Hispanic Black or Other); Model 2 was adjusted as model 1 plus education level (below high school, high school, or above high school), family poverty income ratio (continuous), drinking status (nondrinker, low-to-moderate drinker, or heavy drinker), smoking status (never smoker, former smoker, or current smoker), physical activity (inactive, insufficiently active, or active), and metabolic syndrome (yes or no).

**Table S3.** Baseline characteristics of adults with psoriasis in NHANES 2003–2006 and 2009–2014.

| Characteristics | Total (N=600) | All-cause Mortality | | | *P* value |
| --- | --- | --- | --- | --- | --- |
| No (N=521) | | Yes (N=79) |
| Age, years | 47.64(0.75) | 45.98(0.75) | | 62.51(1.70) | <0.001 |
| Male, % | 285(47.5) | 244(48.79) | | 41(42.40) | 0.362 |
| Race/ethnicity, % |  |  | |  | 0.277 |
| Mexican American | 48(8) | 44(3.90) | | 4(1.90) |  |
| Other Hispanic | 46(7.67) | 44(4.17) | | 2(0.88) |  |
| Non-Hispanic White | 370(61.67) | 309(80.31) | | 61(87.83) |  |
| Non-Hispanic Black | 75(12.5) | 67(6.00) | | 8(4.10) |  |
| Other race | 61(10.17) | 57(5.62) | | 4(5.28) |  |
| Education level, % |  |  | |  | 0.092 |
| Below high school | 120(20) | 102(13.37) | | 18(19.13) |  |
| High school | 134(22.33) | 111(20.11) | | 23(30.21) |  |
| Above high school | 346(57.67) | 308(66.52) | | 38(50.66) |  |
| Family PIR, % | 3.14(0.08) | 3.21(0.09) | | 2.59(0.25) |  |
| Smoking status, % |  |  | |  | 0.007 |
| Never smoker | 264(44) | 248(45.59) | | 16(23.04) |  |
| Former smoker | 196(32.67) | 152(33.56) | | 44(52.76) |  |
| Current smoker | 140(23.33) | 121(20.86) | | 19(24.20) |  |
| Drinking status, % |  |  | |  | 0.201 |
| Nondrinker | 111(18.5) | 93(14.92) | | 18(22.76) |  |
| Low-to-moderate drinker | 432(72) | 380(74.66) | | 52(65.38) |  |
| Heavy drinker | 57(9.5) | 48(10.42) | | 9(11.86) |  |
| Physical activity, % |  |  | |  | <0.001 |
| Inactive | 155(25.83) | 117(18.78) | | 38(43.33) |  |
| Insufficiently active | 231(38.5) | 205(42.94) | | 26(37.53) |  |
| Active | 214(35.67) | 199(38.28) | | 15(19.14) |  |
| MetS, % | 264(44) | 211(36.62) | | 53(65.72) | <0.001 |
| Degree of Psoriasis, % |  |  | |  | 0.679 |
| Little or no psoriasis | 243(56.64) | 217(56.19) | | 26(56.00) |  |
| Only a few patches | 106(24.71) | 96(25.19) | | 10(24.93) |  |
| Scattered patches | 61(14.22) | 54(14.55) | | 7(10.92) |  |
| Extensive psoriasis | 19(4.43) | 16(4.06) | | 3(8.16) |  |
| CBC count, 103/μL |  |  | |  |  |
| White blood cell | 7.20(5.70,8.70) | 7.10(5.60,8.40) | | 8.00(6.70,9.60) | 0.003 |
| Neutrophils | 4.30(3.20,5.50) | 4.20(3.20,5.40) | | 5.00(4.00,6.50) | <0.001 |
| Lymphocyte | 2.00(1.50,2.50) | 2.00(1.50,2.50) | | 1.80(1.50,2.40) | 0.533 |
| Monocyte | 0.50(0.40,0.70) | 0.50(0.40,0.60) | | 0.60(0.50,0.80) | <0.001 |
| Platelet | 241.00(209.00,294.00) | 243.00(210.00,291.00) | | 232.00(192.00,317.00) | 0.667 |
| CBC-derived indicators | | |  | |  |
| NLR | 2.18(1.67,2.95) | 2.14(1.64,2.92) | | 2.79(1.93,3.50) | <0.001 |
| dNLR | 1.56(1.21,2.00) | 1.52(1.20,2.00) | | 1.84(1.48,2.13) | 0.002 |
| MLR | 0.27(0.21,0.36) | 0.27(0.21,0.35) | | 0.33(0.25,0.44) | 0.002 |
| NMLR | 2.43(1.90,3.25) | 2.39(1.88,3.21) | | 3.08(2.15,4.08) | <0.001 |
| PLR | 127.14(101.11,158.50) | 125.00(101.15,156.09) | | 137.39(97.50,173.57) | 0.500 |
| SIRI, 103/μL | 1.16(0.78,1.71) | 1.11(0.76,1.64) | | 1.68(1.13,2.45) | <0.001 |

Abbreviations: PIR, poverty income ratio; NLR, neutrophil to lymphocyte ratio; dNLR, derived NLR; MLR, monocyte to lymphocyte ratio; NMLR, neutrophil-monocyte to lymphocyte ratio; PLR, platelet to lymphocyte ratio; SIRI, systemic inflammatory response index; CBC, complete blood cell.

Normally distributed continuous variables are described as means ± SEs, and continuous variables without a normal distribution are presented as medians [interquartile ranges]. Categorical variables are presented as numbers (percentages). N reflect the study sample while percentages reflect the survey-weighted.

**Table S4.** HRs (95% CIs) of all-cause mortality according to quartiles of complete blood cell (CBC) counts among adults with psoriasis in NHANES 2003–2006 and 2009–2014.

|  | Quartiles of CBC-derived inflammatory biomarkers levels | | | | *P*trend |
| --- | --- | --- | --- | --- | --- |
|  | Quartile 1 | Quartile 2 | Quartile 3 | Quartile 4 |
| **WBC** | |  |  |  |  |
| Range | <5.9 | 5.9-7.1 | 7.2-8.7 | >8.7 |  |
| Crude | 1 [Reference] | 1.812(0.765,4.288) | 1.589(0.735,3.436) | 3.173(1.516,6.639) | 0.006 |
| Model 1 | 1 [Reference] | 1.820(0.756,4.381) | 2.006(0.992,4.056) | 4.479(2.062,9.728) | <0.001 |
| Model 2 | 1 [Reference] | 1.960(0.760, 5.059) | 1.547(0.763, 3.135) | 3.926(1.688, 9.131) | 0.004 |
| **NEU** | |  |  |  |  |
| Range | <3.3 | 3.3-4.3 | 4.4-5.5 | >5.5 |  |
| Crude | 1 [Reference] | 2.247(0.961,5.257) | 2.992(1.300,6.886) | 3.877(1.688,8.907) | 0.001 |
| Model 1 | 1 [Reference] | 2.285(0.982, 5.315) | 3.032(1.197, 7.678) | 4.336(1.828,10.289) | <0.001 |
| Model 2 | 1 [Reference] | 2.434(0.983,6.027) | 2.763(1.068,7.147) | 3.332(1.335,8.315) | 0.007 |
| **LYM** |  |  |  |  |  |
| Range | <1.5 | 1.5-2.0 | 2.1-2.5 | >2.5 |  |
| Crude | 1 [Reference] | 1.044(0.553,1.971) | 0.855(0.386,1.894) | 0.818(0.305,2.199) | 0.6 |
| Model 1 | 1 [Reference] | 1.259(0.674,2.354) | 1.506(0.695,3.264) | 1.920(0.648,5.689) | 0.233 |
| Model 2 | 1 [Reference] | 1.378(0.687,2.764) | 1.521(0.761,3.039) | 1.749(0.617,4.958) | 0.292 |
| **MON** |  |  |  |  |  |
| Range | <0.4 | 0.4-0.5 | 0.6-0.7 | >0.7 |  |
| Crude | 1 [Reference] | 2.539(0.932, 6.919) | 3.141(1.276, 7.733) | 6.896(2.840,16.743) | <0.001 |
| Model 1 | 1 [Reference] | 2.552(0.951, 6.849) | 3.733(1.460, 9.542) | 7.060(2.646,18.840) | <0.001 |
| Model 2 | 1 [Reference] | 2.477(0.903, 6.793) | 3.019(1.160, 7.852) | 5.881(2.236,15.467) | <0.001 |
| **PLT** |  |  |  |  |  |
| Range | <202.0 | 202.0-237.0 | 238.0-285.0 | >285.0 |  |
| Crude | 1 [Reference] | 0.745(0.354,1.566) | 0.200(0.084,0.476) | 0.795(0.374,1.690) | 0.499 |
| Model 1 | 1 [Reference] | 1.423(0.651,3.111) | 0.449(0.164,1.230) | 2.005(0.879,4.572) | 0.179 |
| Model 2 | 1 [Reference] | 1.536(0.705, 3.344) | 0.397(0.153, 1.030) | 2.033(0.961, 4.298) | 0.142 |

Data are presented as HR (95% CI) unless indicated otherwise; Model 1 was adjusted as age (continuous), sex (male or female), and race/ethnicity (Mexican American, Other Hispanic, Non-Hispanic White, Non-Hispanic Black or Other); Model 2 was adjusted as model 1 plus education level (below high school, high school, or above high school), family poverty income ratio (continuous), drinking status (nondrinker, low-to-moderate drinker, or heavy drinker), smoking status (never smoker, former smoker, or current smoker), physical activity (inactive, insufficiently active, or active), and metabolic syndrome (yes or no).

**Table S5.** HRs (95% CIs) of all-cause mortality according to quartiles of CBC-derived inflammatory biomarkers levels among adults with psoriasis after excluding participants who had cancer history at baseline in NHANES 2003–2006 and 2009–2014(n=521).

|  | Quartiles of CBC-derived inflammatory biomarkers levels | | | |  |
| --- | --- | --- | --- | --- | --- |
|  | Quartile 1 | Quartile 2 | Quartile 3 | Quartile 4 | *P* trend |
| NLR | 1 [Reference] | 1.624(0.366, 7.212) | 3.275(0.892,12.028) | 3.082(1.051, 9.042) | 0.004 |
| dNLR | 1 [Reference] | 1.141(0.304, 4.283) | 3.763(0.942,15.029) | 2.272(0.934, 5.524) | 0.018 |
| MLR | 1 [Reference] | 1.073(0.300, 3.839) | 1.854(0.583, 5.897) | 3.124(1.170, 8.344) | 0.003 |
| NMLR | 1 [Reference] | 3.796(0.789,18.267) | 3.801(0.866,16.671) | 4.867(1.406,16.841) | 0.002 |
| PLR | 1 [Reference] | 0.660(0.223, 1.955) | 1.666(0.705, 3.935) | 2.781(1.288, 6.007) | 0.002 |
| SIRI | 1 [Reference] | 0.628(0.117, 3.370) | 1.878(0.624, 5.658) | 2.642(0.965, 7.237) | 0.001 |

Data are presented as HR (95% CI) unless indicated otherwise; Model was adjusted as age (continuous), sex (male or female), race/ethnicity (Mexican American, Other Hispanic, Non-Hispanic White, Non-Hispanic Black or Other), education level (below high school, high school, or above high school), family poverty income ratio (continuous), drinking status (nondrinker, low-to-moderate drinker, or heavy drinker), smoking status (never smoker, former smoker, or current smoker), physical activity (inactive, insufficiently active, or active), and metabolic syndrome (yes or no).
